# Supplementary material for: Fetal Brain Infection Is Not a Unique Characteristic of Brazilian Zika Viruses
Source: PubMed Central journal article supplement (PMC6213914; doi:10.3390/v10100541), 2018-10-03
Supplement: viruses-10-00541-s001.pdf [file viruses-10-00541-s001.pdf]

## Supplementary Materials:

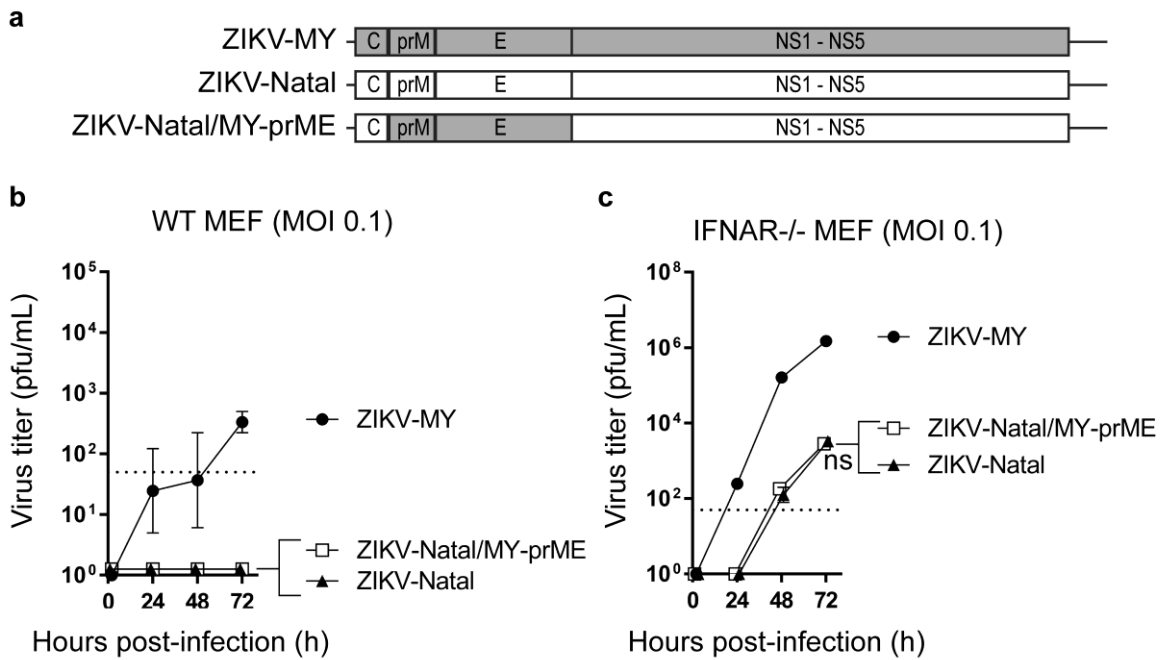

**Figure S1.** Construction and characterization of ZIKV-Natal/MY-prM/E chimeric virus. (a) Schematic depicting the ZIKV-MY and ZIKV-Natal parental viruses, and the constructed ZIKV-Natal/MY-prME chimeric virus; Growth kinetics comparing ZIKV-MY, ZIKV-Natal, and ZIKV-Natal/MY-prME was performed on (b) WT and (c) IFNAR<sup>-/-</sup> MEF cells at an MOI of 0.1, and culture supernatants harvested at the indicated time points post infection and titered on Vero cell by plaque assay.
